# Supplementary material for: Mismatch repair deficiency is not sufficient to elicit tumor immunogenicity
Source: PubMed Central journal article supplement (PMC10562252; doi:10.1038/s41588-023-01499-4), 2023-09-14

# Source Data Fig. 7

Related to Extended Data Figure 1e

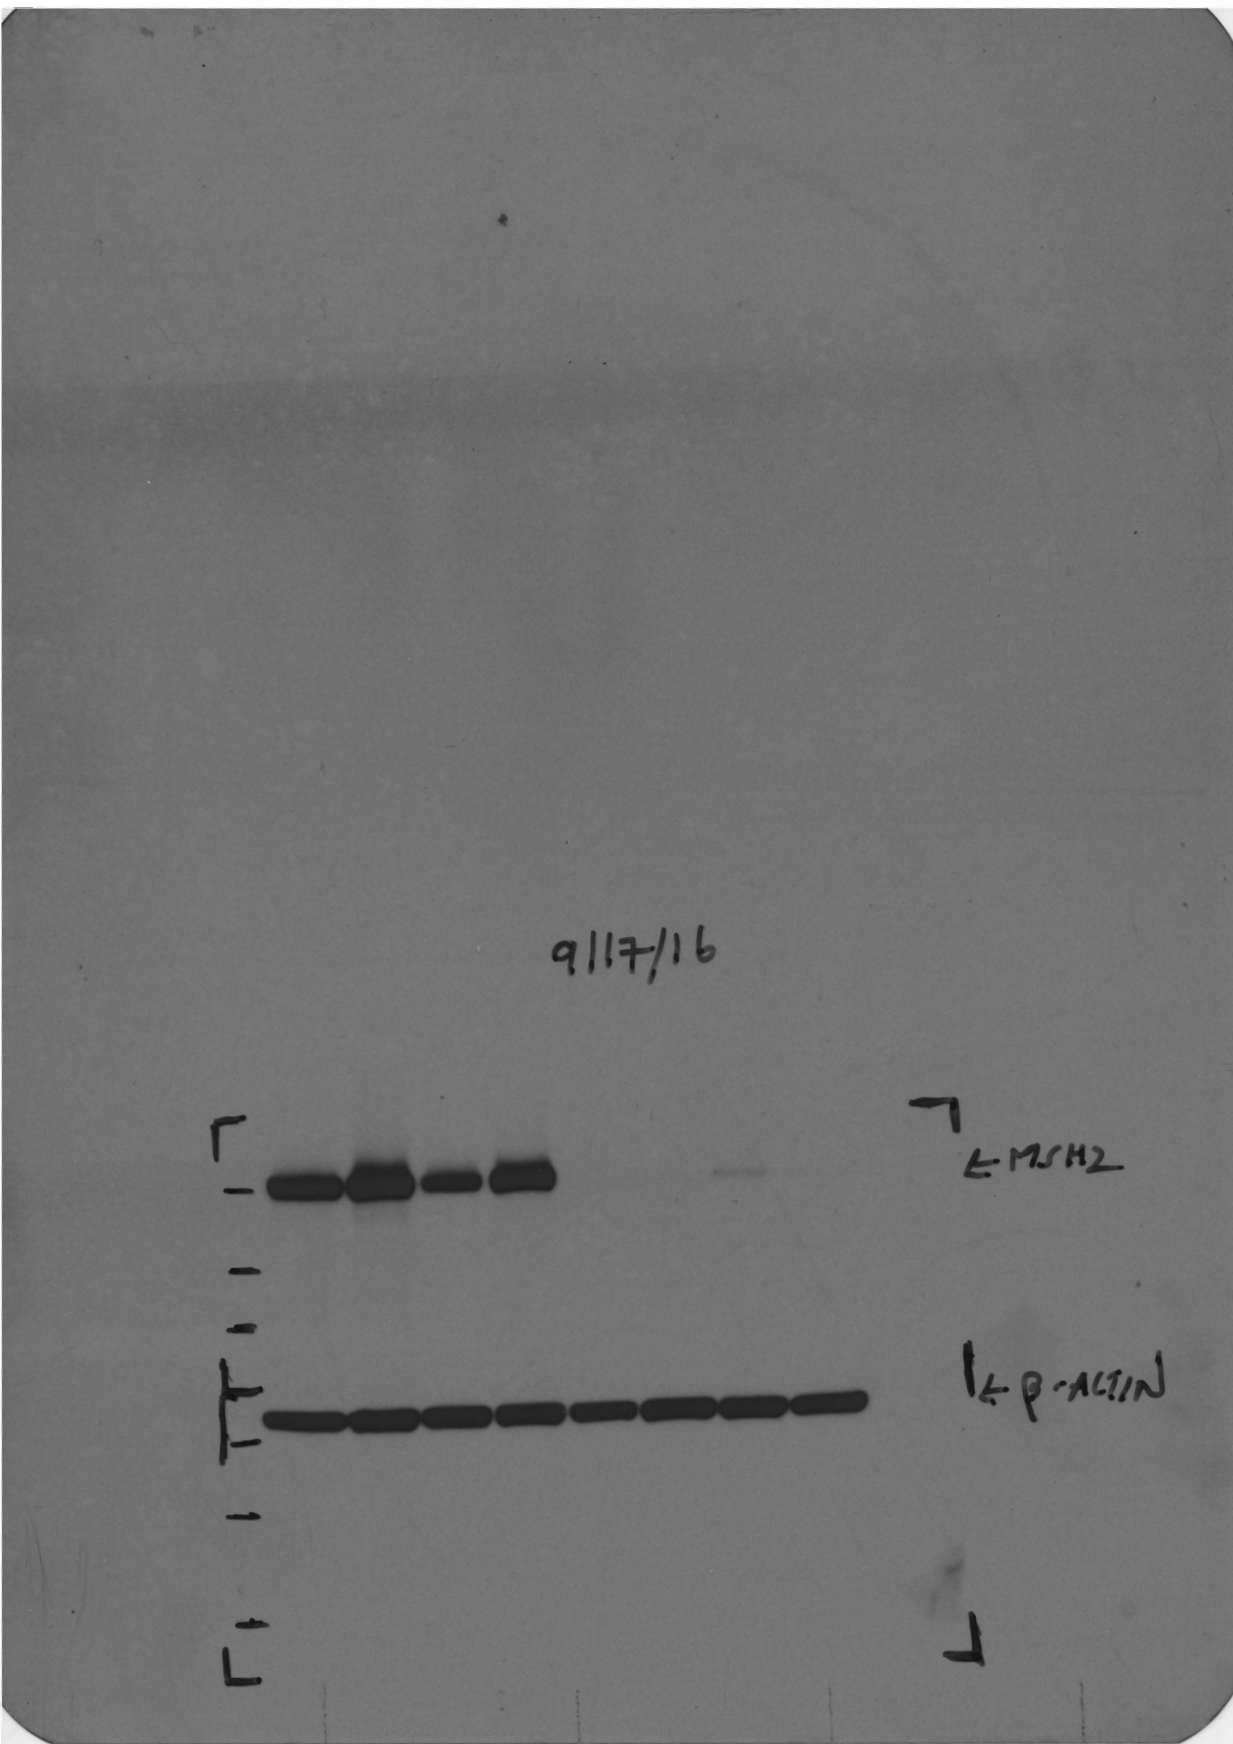

# Source Data Fig. 7

Related to Extended Data Figure 1h

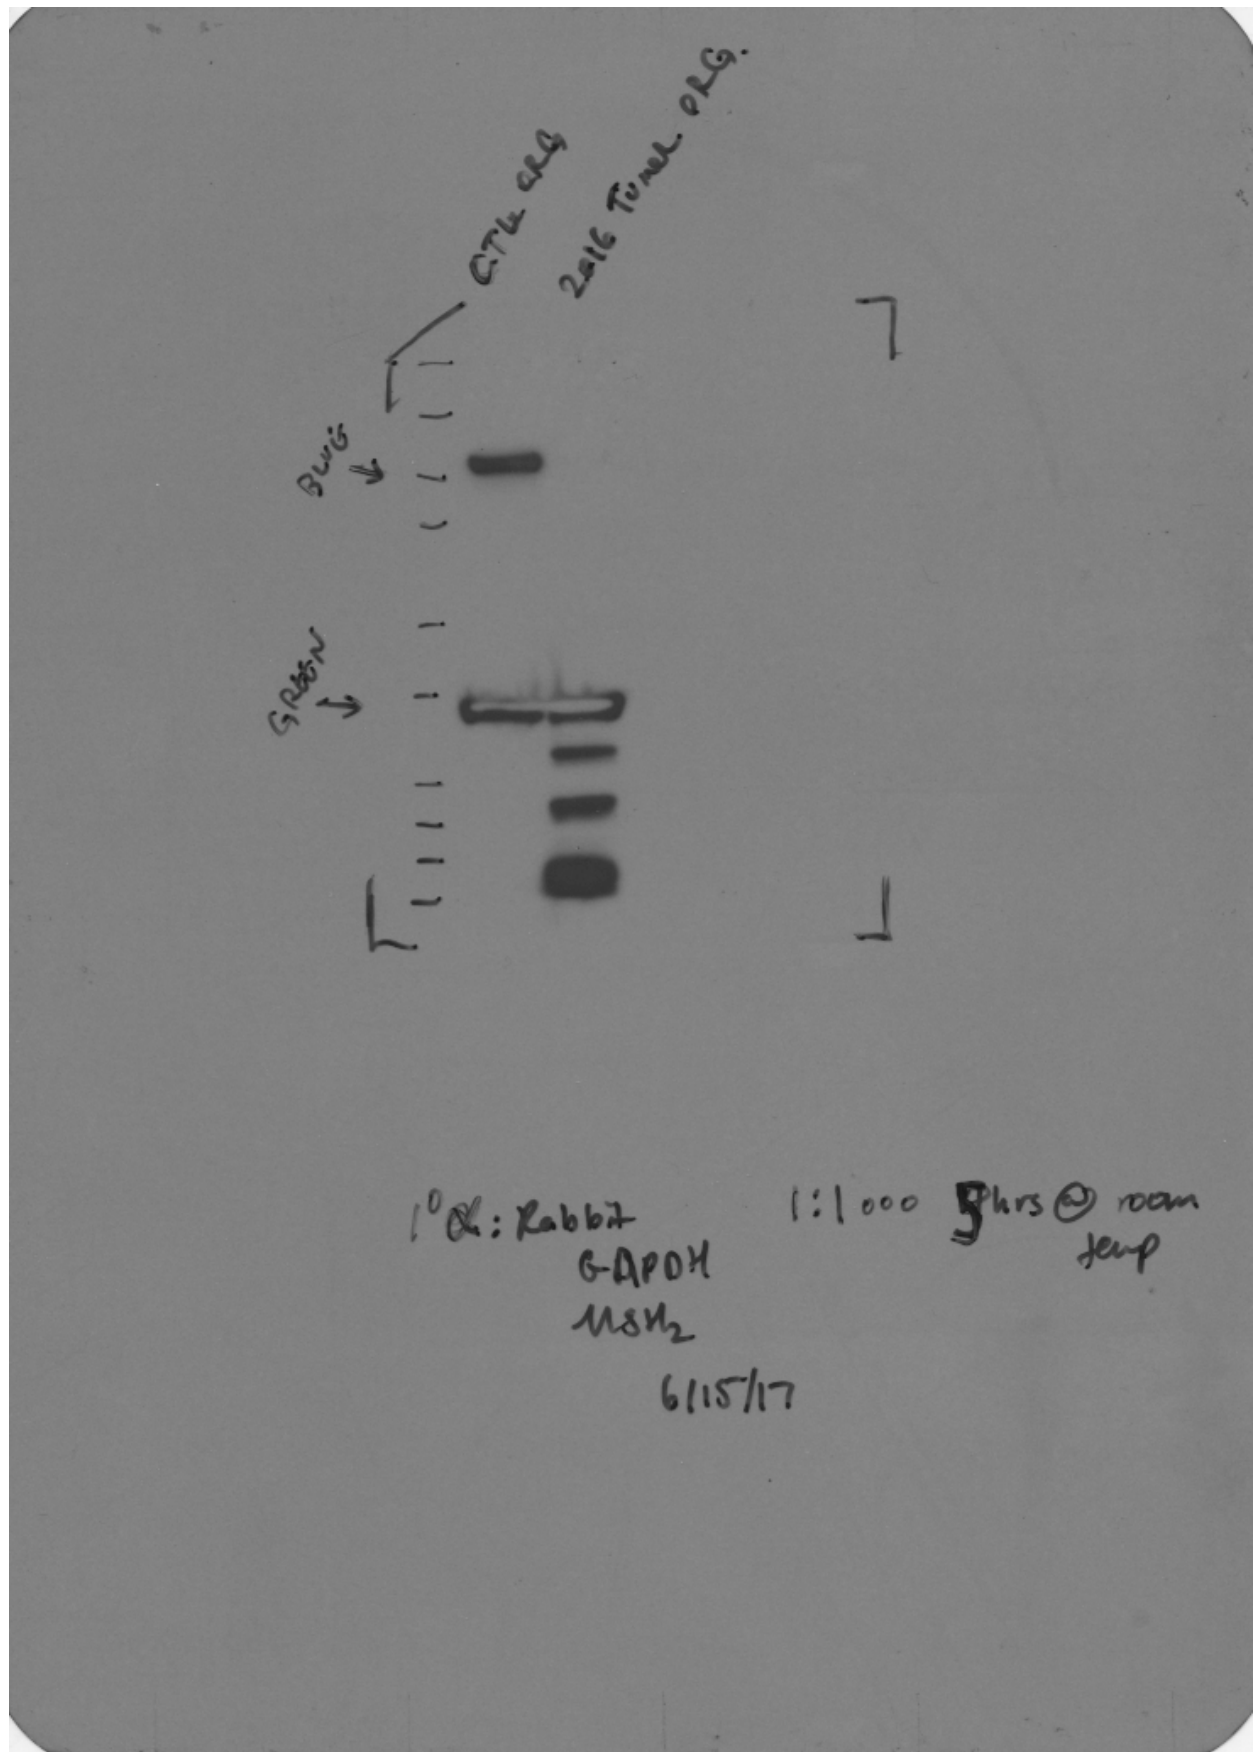

# Source Data Fig. 7

Related to Extended Data Figure 3d

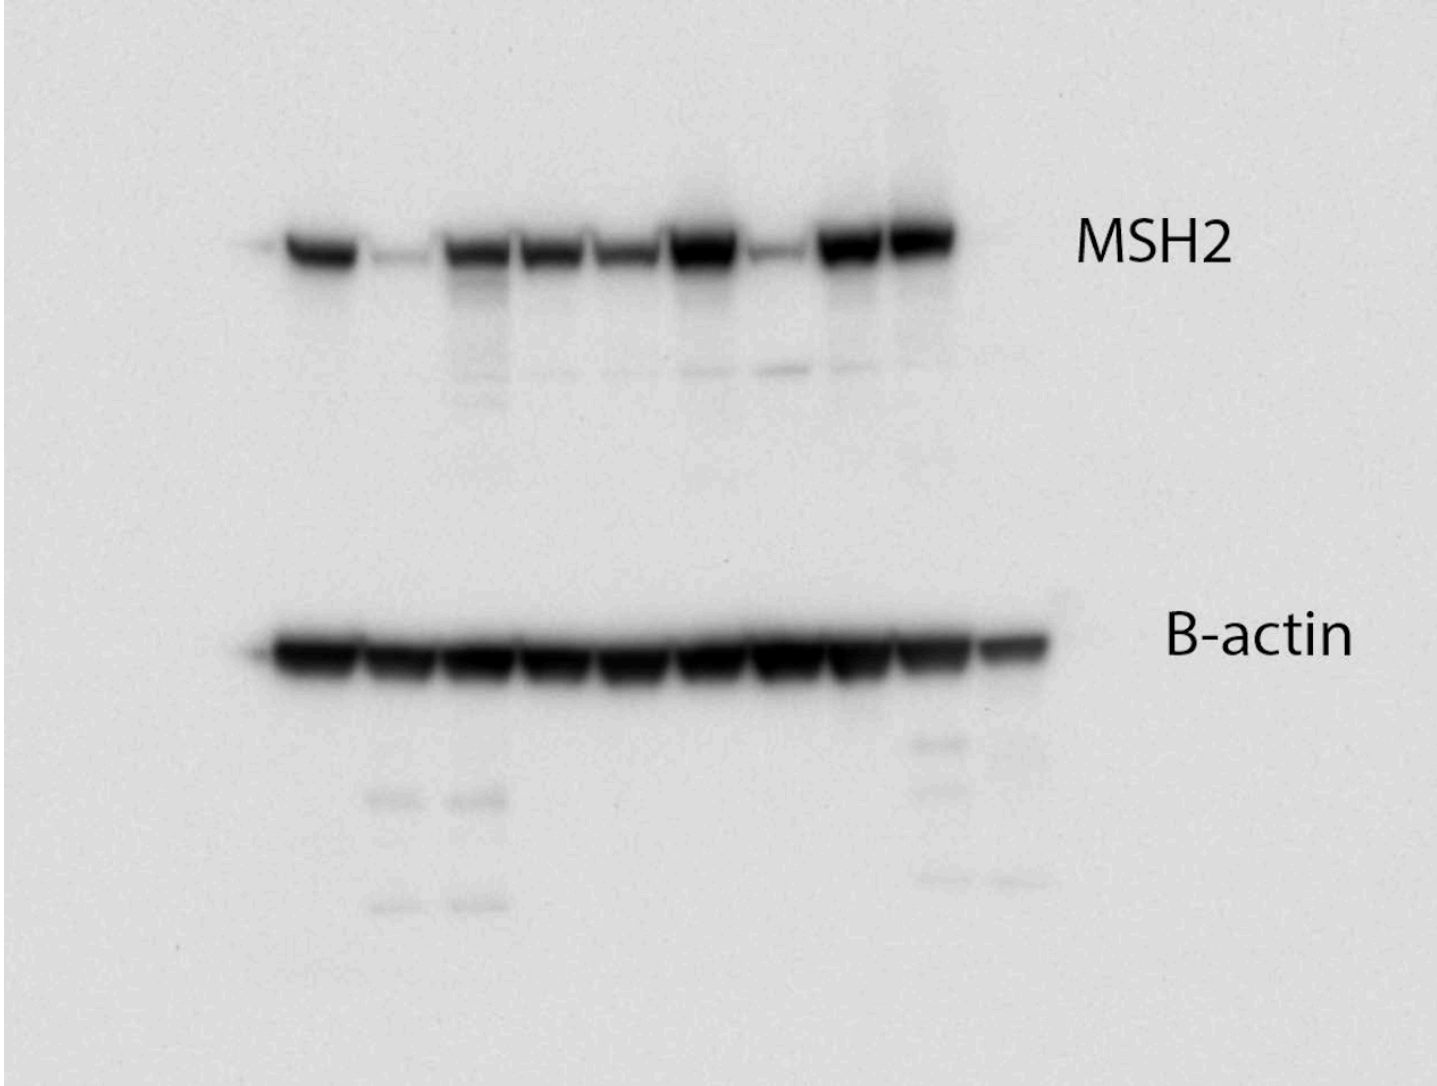

Supplement: 41588_2023_1499_MOESM16_ESM.pdf [file 41588_2023_1499_MOESM16_ESM.pdf]
